# Supplementary material for: Catalytic enantioselective intermolecular [2 + 2 + 2] cycloaddition of an alkene and two alkynesElectronic supplementary information (ESI) available: experimental and spectroscopic data. See http://www.rsc.org/suppdata/cc/b2/b208313b/
Source: Royal Society of Chemistry journal article supplement (doi:10.1039/b208313b), 2002-09-20
Supplement: b208313b.doc [file b208313b.doc]

**Supporting Information**

**Catalytic enantioselective intermolecular [2 + 2 + 2] cycloaddition of alkene and two alkynes**

Shin-ichi Ikeda,* Hirokazu Kondo, Taro Arii, and Kazunori Odashima

*Graduate School of Pharmaceutical Sciences, Nagoya City University, Tanabe-dori, Mizuho-ku, Nagoya 467-8603, Japan*

**General Comments.** All reactions were carried out under dry N2 atmosphere. 1H and 13C NMR spectra were recorded in CDCl3 with Me4Si as an internal standard. Under otherwise noted, all materials were obtained from commercial suppliers and used without further purification. THF and Et2O were distilled from sodium/benzophenone after lithium aluminum hydride. DMF and CH2Cl2 were distilled from calcium hydride. MeCN and chlorobenzene were distilled from phosphorus pentoxide. Pyridine and Et3N were distilled from potassium hydroxide.

**(4*S*)-4-Methyl-2-phenyl-4,5-dihydrooxazole ((*S*)-9a).** To a solution of ZnCl2 (140 mg, 1.0 mmol) and benzonitrile (1470 mg, 14.3 mmol) in chlorobenzene (15 mL) was added (*S*)-2-amino-1-propanol (755 mg, 10.0 mmol). The mixture was heated under reflux for 24 h. The solvent was removed under reduced pressure to give an oily residue, which was dissolved in Et2O. The solution was extracted with water and the aqueous phase with Et2O. The combined organic phases were washed with 20 % NaOH (20 mL), dried with MgSO4, and the solvent removed *in* *vacuo*. The residue was purified by column chromatography on silica gel to yield **9a** (1040 mg, 64%) as a colorless oil. []D23 –90.2° (*c* 0.71, CHCl3); *Rf* = 0.27 (hexane/AcOEt = 4:1); 1H NMR (400 MHz, CDCl3)  1.28 (d, *J* = 6.6 Hz, 3 H), 3.87 (t, *J* = 8.1 Hz, 1 H), 4.25-4.34 (m, 1 H), 4.44 (dd, *J* = 10.7, 8.1 Hz, 1 H), 7.30-7.41 (m, 3 H), 7.88 (d, *J* = 6.8 Hz, 2 H); IR (neat) 2971, 2895, 1649, 1450, 1356, 1057, 696 cm-1; GCMS (EI, 70 eV) *m/z* (rel int, %) 161 (M+, 39), 146 (100); HRMS for C10H11ON (M+): Calcd, 161.0841. Found, 161.0843.

**(4*S*)-2-Phenyl-4-*iso*-propyl-4,5-dihydrooxazole ((*S*)-9b).** This compound was prepared by the procedure employed for **9a**, starting from benzonitrile (1150 mg, 11.2 mmol), L-2-amino-3-methyl-1-butanol (932 mg, 9.0 mmol), ZnCl2 (136 mg, 1.0 mmol), chlorobenzene (20 mL). a colorless oil; []D23 –83.2° (*c* 0.56, CHCl3); *Rf* = 0.43 (hexane/AcOEt = 4:1); 1H NMR (270 MHz, CDCl3)  0.93 (d, *J* = 6.6 Hz, 3 H), 1.03 (d, *J* = 6.6 Hz, 3 H), 1.80-1.90 (m, 1 H), 4.06-4.17 (m, 2 H), 4.35-4.45 (m, 1 H), 7.36-7.49 (m, 3 H), 7.95 (d, *J* = 6.9 Hz, 2 H); IR (neat) 2961, 1651, 1450, 1354, 1067, 694 cm-1; GCMS (EI, 70 eV) *m/z* (rel int, %) 189 (M+, 4), 146 (100); HRMS for C8H8ON (M+ – *i*Pr): Calcd, 146.0606. Found, 146.0598.

**(4*R*)-2,4-Diphenyl-4,5-dihydrooxazole ((*R*)-9c).** This compound was prepared by the procedure employed for **9a**, starting from benzonitrile (2.60 g, 25.2 mmol), (*R*)-phenylglycinol (2.74 g, 20.0 mmol), ZnCl2 (273 mg, 2.0 mmol), chlorobenzene (25 mL). a colorless oil; []D23 +34.3° (*c* 0.57, CHCl3); *Rf* = 0.37 (hexane/AcOEt = 5:1); 1H NMR (400 MHz, CDCl3)  4.17 (t, *J* = 8.3 Hz, 1 H), 4.68 (dd, *J* = 10.0, 8.3 Hz, 1 H), 5.28 (dd, *J* = 10.0, 8.3 Hz, 1 H), 7.16-7.47 (m, 8 H), 7.96 (d, *J* = 7.1 Hz, 2 H); IR (neat) 3030, 2898, 1646, 1450, 1357, 1066, 1025, 952, 696 cm-1; GCMS (EI, 70 eV) *m/z* (rel int, %) 223 (M+, 61), 193 (100);HRMS for C15H13ON (M+): Calcd, 223.0997. Found, 223.0997.

**(4*R*)-2,4,5,5-tetraphenyl-4,5-dihydrooxazole (10).** To a suspension of (*R*)-2-amino-1,1,2-triphenylethanol3 (2.89 g, 10 mmol) and methyl benzimidate hydrochloride (1.72 g, 10 mmol) in chlorobenzene (6 mL) was added Et3N (4 mL, 28 mmol) and the reaction mixture was refluxed for 48 h. After removal of the solvent, the residue was dissolved in Et2O (7 mL) and filtered. The solution was extracted with 10% HCl, dried with MgSO4, and evaporated. The crude product was purified by column chromatography on silica gel to give the pure **10** as a white solid (0.77 g, 21%); a pale yellow crystal: []D23 +291° (*c* 0.47, CHCl3); mp 41-43 °C; *Rf* = 0.25 (hexane/AcOEt = 5:1); 1H NMR (400 MHz, CDCl3)  6.13 (s, 1 H), 6.97-7.07 (m, 10 H), 7.33-7.59 (m, 6 H), 7.73 (d, *J* = 7.6 Hz, 2 H), 8.23 (d, *J* = 7.1 Hz, 2 H); IR (disk) 3059, 3028, 2930, 1664, 1602, 1581, 1493, 1447, 1342, 1078, 982, 752 cm-1; DIMS (EI, 70 eV) *m/z* (rel int, %) 375 (M+, 12), 270 (12), 193 (100); HRMS for C27H21NO (M+): Calcd, 375.1623. Found, 375.1618.

**References**

(1) Brunner, H.; Obermann, U. *Chem. Ber*. **1989**, *122*, 499. Bolm, C.; Weickhardt, K.; Zehnder, M.; Ranff, T. *Chem. Ber*. **1991**, *124*, 1173.

(2) Richards, C. J.; Mulvaney, A. W. *Tetrahedron: Asymmetry* **1996**, *7*, 1419.

(3) Berenguer, R.; Garcia, J.; Vilarrasa, J. *Tetrahedron: Asymmetry* **1994**, *5*, 165.

For **(*S*)-9d**, see: Kamata, K.; Agata, I.; Meyers, A. I. *J. Org. Chem.* **1998**, *121*, 4712.

**General procedure for Cycloaddition.** To a solution of Ni(acac)2 (0.05 mmol) and ligand (bidentate: 0.05 mmol, monodentate: 0.1 mmol) in THF (5 mL) were added Me3Al in a 1.0 M hexane solution (0.4 mL) at 0 °C under N2. After stirring for 5 min, phenol (1.1 mmol) in THF (1 mL) was added to this solution, and the mixture was stirred for 5 min. To the dark red solution were added alkyne **2** (2.2 mmol) and enone **1** (1.0 mmol) at 0 °C, and the mixture was then stirred at room temperature for 2 h. Aqueous HCl (0.2 M, 30 mL) was added, and stirring was continued for 10 min. The aqueous layer was extracted with Et2O. The combined organic layer was washed with brine, dried over MgSO4 for 30 min, filtered, and concentrated under reduced pressure. The residue was purified by column chromatography on silica gel to give the corresponding cycloadduct **3**. Enantiomeric excess (ee) was determined by chiral HPLC or GC analysis or by 1H NMR spectra using Eu(hfc)3. An analytical sample was obtained by bulb-to-bulb distillation.

**(3a*R*, 7a*S*)-(–)-4,5,6,7-Tetraethyl-2,3,3a,7a-tetrahydroinden-1-one (3aa, 45% ee):** a colorless oil; []D22 –124° (*c* 0.51, CHCl3); bp 130 °C (2.5 mmHg); *Rf* = 0.31 (hexane/AcOEt = 14:1); 1H NMR (400 MHz, CDCl3)  0.90-1.07 (m, 12 H), 1.93-2.36 (m, 12 H), 2.66-2.71 (m, 1 H), 2.85 (d, *J* = 9.2 Hz, 1 H); 13C NMR (100.5 MHz, CDCl3)  13.82, 13.84, 15.27, 15.44, 21.00, 21.14, 23.79, 24.49, 26.29, 36.36, 40.01, 53.65, 125.98, 133.19, 133.54, 133.99, 221.20; IR (neat) 2965, 2932, 2874, 1740 (CO), 1453, 1375, 1161, 1132 cm-1; GCMS (EI, 70 eV) *m/z* (rel int, %) 246 (M+, 55), 175 (100). Anal. Calcd for C17H26O: C, 82.87; H, 10.64. Found: C, 82.75; H, 10.79. HPLC column: Daicel CHIRALPAK AS, 0.46 x 25 cm; solvent: hexane/*i*PrOH = 19:1; flow rate: 0.2 mL/min; detector: RI; retention time: (+)-**3aa**, 19.9 min; (–)-**3aa**, 22.0 min.

**(–)-5,7-Dibutyl-2,3,3a,7a-tetrahydroinden-1-one (3ab, 48% ee):** a colorless oil; []D23 –164° (*c* 0.52, CHCl3); bp 150 °C (3.5 mmHg); *Rf* = 0.37 (hexane/AcOEt = 9:1); 1H NMR (500 MHz, CDCl3)  0.87 (t, *J* = 7.3 Hz, 3 H), 0.91 (t, *J* = 7.3 Hz, 3 H), 1.20-1.55 (m, 8 H), 1.93-2.03 (m, 4 H), 2.05-2.14 (m, 1 H), 2.27 (t, *J* = 7.6 Hz, 2 H), 2.27-2.33 (m, 1 H), 2.65 (d, *J* = 9.8 Hz, 1 H), 3.23-3.26 (m, 1 H), 5.10 (s, 1 H), 5.53 (s, 1 H); 13C NMR (125.7 MHz, CDCl3)  13.90, 14.00, 22.17, 22.48, 27.93, 29.60, 30.38, 35.43, 35.63, 37.38, 37.49, 51.63, 120.31, 120.83, 136.58, 137.48, 219.98; IR (neat) 2957, 2928, 2872, 1739 (CO), 1460, 1125 cm–1; GC/MS (EI, 70 eV) *m/z* (rel int, %) 246 (M+, 59), 105 (100). Anal. Calcd for C17H26O: C, 82.87; H, 10.64. Found: C, 83.00; H, 10.71. GC column: chiraldex CB 0.25 mm x 25 m; inlet pressur: 1.0 kg/cm-2 (He); column temp.: 170 °C; retention time: (+)-**3ab**, 15.4 min; (–)-**3ab**, 16.2 min.

**(–)-5,7-Bis[[(2-*tert*-butyldimethylsilyl)oxy]ethyl]-2,3,3a,7a-tetrahydroinden-1-one (3ac, 62% ee):** a colorless oil; []D23 –110° (*c* 0.50, CHCl3); bp 205 °C (5 mmHg); *Rf* = 0.31 (hexane/AcOEt = 4:1); 1H NMR (500 MHz, CDCl3)  0.025 (s, 6 H), 0.046 (s, 6 H), 0.88 (s, 18 H), 1.92-2.57 (m, 8 H), 2.76 (d, *J* = 10.5 Hz, 1 H), 3.21-3.30 (m, 1 H), 3.61 (t, J = 6.8 Hz, 2 H), 3.68-3.80 (m, 2 H), 5.19 (s, 1 H), 5.60 (s, 1 H); 13C NMR (125 MHz, CDCl3)  -5.44, -5.40, 18.16, 18.14, 25.84, 27.80, 37.22, 37.41, 38.96, 39.21, 51.24, 61.85, 62.34, 122.67, 122.73, 133.33, 134.07, 219.23; IR (KBr) 2930, 2859, 1742 (CO), 1472, 1254, 1098, 837, 775 cm-1; DIMS (EI, 70 eV) *m/z* (rel int, %) 450 (M+, 3), 391 (78), 186 (100). Anal. Calcd for C25H46O3Si2: C, 66.61; H, 10.29. Found: C, 66.43; H, 10.29. 1H NMR using Eu(hfc)3 (3.5 equiv vs **3ac**, splitting ( 1.16 ((+)-**3ac**) and 1.19 ((–)-**3ac**)) and ( 1.25 ((–)-**3ac**) and 1.30 ((+)-**3ac**)) of the signal for  0.88; splitting ( 8.18 ((–)-**3ac**) and 8.23 ((+)-**3ac**)) of the signal for  5.60)

**(–)-5,7-Di-*tert*-butyl-2,3,3a,7a-tetrahydroinden-1-one (3ad, 58% ee):** white crystals; []D17 –180° (*c* 0.50, CHCl3); mp 60-63 °C; *Rf* = 0.37 (hexane/AcOEt =14:1); 1H NMR (400 MHz, CDCl3)  1.01 (s, 9 H), 1.14 (s, 9 H), 1.86-1.95 (m, 1 H), 2.10-2.25 (m, 2 H), 2.32 (dd, *J* = 18.0, 8.3 Hz, 1 H), 2.74 (d, *J* = 8.3 Hz, 1 H), 3.13-3.17 (m, 1 H), 5.13 (s, 1 H), 5.89 (s, 1 H); 13C NMR (100 MHz, CDCl3)  27.60, 28.96, 29.14, 29.35, 34.18, 35.93, 36.79, 38.90, 50.02, 116.40, 117.89, 145.56, 148.02, 219.32; IR (disk) 2965, 2872, 1742 (CO), 1478, 1460, 1364, 1138 cm-1; GCMS (EI, 70 eV) *m/z* (rel int, %) 246 (M+, 36), 231 (47), 203 (56), 175 (88), 57 (100). Anal. Calcd for C17H26O: C, 82.87; H, 10.64. Found: C, 82.80; H, 10.88. 1H NMR using Eu(hfc)3 (0.5 equiv vs **3ad**, splitting ( 1.65 ((–)-**3ad**) and 1.75 ((+)-**3ad)**) of the signal for  1.14). GC column: chiraldex CB 0.25 mm x 25 m; inlet pressur: 1.0 kg/cm-2 (He); column temp.: 150 °C; retention time: (+)-**3ad**, 13.7 min; (–)-**3ad**, 14.0 min.

**(–)-5,7-Diphenyl-2,3,3a,7a-tetrahydroinden-1-one (3ae, 55% ee):** white crystals; []D23 –36.6° (*c* 0.50, CHCl3); mp 124-126 °C; *Rf* = 0.34 (hexane/AcOEt = 4:1); 1H NMR (500 MHz, CDCl3)  2.04-2.12 (m, 1 H), 2.30-2.39 (m, 2 H), 2.48-2.53 (m, 1 H), 3.35 (d, *J* = 9.2 Hz, 1 H), 3.66 (br, 1 H), 5.85 (d, *J* = 2.5 Hz, 1 H), 6.69 (s, 1 H), 7.24-7.73 (m, 10 H); 13C NMR (125 MHz, CDCl3)  27.91, 37.49, 38.83, 51.62, 121.83, 125.14, 125.81, 126.03, 127.52, 127.59, 128.48, 135.75, 138.77, 139.99, 140.11, 218.65; IR (disk) 3028, 2868, 1726 (CO), 1597, 1494, 1261, 1126, 748 cm-1; GCMS (EI, 70 eV) *m/z* (rel int, %) 286 (M+, 90), 230 (100). Anal. Calcd for C21H18O: C, 88.08; H, 6.34. Found: C, 87.96; H, 6.46. 1H NMR using Eu(hfc)3 (0.3 equiv vs **3ae**, splitting ( 4.17 ((+)-**3ae**) and 4.33 ((–)-**3ae**)) of the signal for  3.66; splitting ( 6.08 ((+)-**3ae**) and 6.15 ((–)-**3ae**)) of the signal for  5.85).

**(–)-3,3-Dimethyl-4,5,6,7-tetraethyl-2,3,3a,7a-tetrahydroinden-1-one (3ba, 53% ee):** white crystals; []D22 –72.2° (*c* 0.52, CHCl3); mp 47-49 °C; *Rf* = 0.37 (hexane/AcOEt = 19:1); 1H NMR (400 MHz, CDCl3)  0.87-1.08 (m, 15 H), 1.20 (s, 3 H), 1.90-1.99 (m, 1 H), 2.04-2.21 (m, 5 H), 2.25-2.38 (m, 3 H), 2.47-2.56 (m, 2 H), 3.14 (d, *J* = 10.0 Hz, 1 H); 13C NMR (100 MHz, CDCl3)  13.71, 14.34, 14.81, 15.47, 21.03, 21.06, 22.17, 24.78, 26.48, 31.73, 39.53, 48.30, 53.24, 53.96, 126.18, 131.50, 133.78, 134.29, 219.95; IR (neat) 2963, 2932, 1736 (CO), 1464, 1375, 1182, 1053 cm-1; GCMS (EI, 70 eV) *m/z* (rel int, %) 274 (M+, 34), 161 (100). Anal. Calcd for C19H30O: C, 83.15; H, 11.02. Found: C, 82.91; H, 11.12. HPLC column: Daicel CHIRALPAK AS; solvent: hexane/*i*PrOH = 49:1; flow rate: 0.2 mL/min; detector RI; retention time: (+)-**3ba**, 19.6 min; (–)-**3ba**, 26.4 min.

**(–)-5,7-Di-*tert*-butyl-3,3-dimethyl-2,3,3a,7a-tetrahydroinden-1-one (3bd, 40% ee):** white crystals; []D22 –99.2° (*c* 0.48, CHCl3); mp 71-73 °C; *Rf* = 0.41 (hexane/AcOEt =19:1); 1H NMR (400 MHz, CDCl3)  1.02 (s, 9 H), 1.14 (s, 9 H), 1.25 (s, 3 H), 1.32 (s, 3 H), 1.78 (d, *J* = 18.5 Hz, 1 H), 2.18 (d, *J* = 18.5 Hz, 1 H), 2.70 (d, *J* = 8.7 Hz, 1 H), 3.19 (d, *J* = 8.7 Hz, 1 H), 5.46 (s, 1 H), 5.91 (s, 1 H); 13C NMR (100 MHz, CDCl3)  26.92, 28.98, 29.16, 29.51, 29.89, 34.46, 35.45, 37.86, 48.84, 49.41, 51.60, 114.11, 116.90, 144.90, 147.37, 219.09; IR (disk) 2961, 2870, 1744 (CO), 1476, 1368, 1102 cm-1; GCMS (EI, 70 eV) *m/z* (rel int, %) 274 (M+, 36), 190 (100). Anal. Calcd for C19H30O: C, 83.15; H, 11.02. Found: C, 83.40; H, 11.25. GC column: chiraldex CB 0.25 mm x 25 m; inlet pressur: 1.0 kg/cm-2 (He); column temp.: 170 °C; retention time: (+)-**3bd**, 15.7 min; (–)-**3bd**, 16.1 min.

**(–)-6,8-Dibutyl-3,4,4a,8a-tetrahydro-2*H*naphthalen-1-one (3cb, 4% ee):** a colorless oil; []D23 –1.23° (*c* 0.90, CHCl3); bp 150 °C (3 mmHg); *Rf* = 0.29 (hexane/AcOEt = 9:1); 1H NMR (400 MHz, CDCl3)  0.88 (t, *J* = 7.2 Hz, 3 H), 0.90 (t, *J* = 7.3 H, 3 H), 1.21-2.39 (m, 18 H), 2.80 (d, *J* = 8.1 Hz, 1 H), 2.88-2.95 (m, 1 H), 5.09 (d, *J* = 1.5 Hz, 1 H), 5.74 (d, *J* = 1.5 Hz, 1 H); 13C NMR (67.8 MHz, CDCl3):  13.87, 13.93, 22.12, 22.48, 24.32, 28.84, 30.15, 30.39, 34.92, 36.05, 39.14, 41.30, 53.10, 121.22, 122.80, 138.51, 138.94, 212.81; IR (neat) 2957, 2928, 2861, 1713 (CO), 1456 cm-1; GCMS (EI, 70 eV) *m/z* (rel int, %) 260 (M+, 53), 190 (100). Anal. Calcd for C18H28O: C, 83.02; H, 10.84. Found: C, 82.74; H, 11.01. 1H NMR using Eu(hfc)3 (0.8 equiv vs **3cb**, splitting ( 7.10 ((+)-**3cb**) and 7.51 ((–)-**3cb)**) of the signal for  5.74).

**Reference**

(1) For the racemic product, see: Sambaiah, T.; Li, L.-P.; Huang, D.-J.; Lin, C.-H.; Rayabarapu, D. K.; Cheng, C.-H. *J. Org. Chem.* **1999**, *64*, 3663.

**Absolute Configulation of 3aa.**

**(1*R**, 3a*R**, 7a*S**)-4,5,6,7-Tetraethyl-2,3,3a,7a-tetrahydro-1*H*inden-1-ol (11) and (1*S**, 7a*S**)-4,5,6,7-Tetraethyl-2,3,7,7a-tetrahydro-1*H*inden-1-ol (12):** To a suspension of LiAlH4 (627 mg, 16.5 mmol) in Et2O (30 mL) was added dropwise over a 30 minute period to a solution of (–)-**3aa** (30% ee, 2763 mg, 11.2 mmol) in Et2O (20 mL) at 0 °C under N2. The mixture was stirred at 0 °C for 2 h. Aqueous HCl (0.2 M, 30 mL) was added dropeise, and stirring was continued for 10 min. The aqueous layer was extracted with Et2O. The combined organic layers were washed with brine, dried over MgSO4 for 30 min, filtered, and concentrated *in vacuo*. The residue was purified by column chromatography on silica gel to yield **11** (1322 mg, 47%) and **12** (1350 mg, 48%); **11**: a colorless oil; []D22 –10.6° (*c* 0.54, CHCl3); bp 70 °C (2 mmHg); *Rf* = 0.15 (hexane/AcOEt = 9:1); 1H NMR (400 MHz, CDCl3)  0.92-1.06 (m, 12 H), 1.43-1.64 (m, 3 H), 1.72-1.85 (m, 1 H), 1.98-2.33 (m, 9 H), 2.45 (dd, *J* = 3.6, 9.5 Hz, 1 H), 2.71 (dt, *J* = 9.5, 7.4 Hz, 1 H), 4.32 (dt, *J* = 3.6, 6.4 Hz, 1 H); 13C NMR (67.9 MHz, CDCl3)  13.62, 13.79, 15.40, 15.46, 20.99, 23.92, 24.46, 30.17, 33.71, 39.98, 50.64, 80.34, 130.91, 131.38, 131.84, 134.59; IR (neat) 3746, 3400, 2962, 2872, 1454, 1375, 1259, 1045, 804 cm-1; GCMS (EI, 70 eV) *m/z* (rel int, %) 248 (M+, 33), 175 (100). Anal. Calcd for C17H28O: C, 82.20; H, 11.36. Found: C, 81.90; H, 11.50.  **12**: a colorless oil; []D22 –7.4° (*c* 0.54, CHCl3); bp 55 °C (1.0 mmHg); *Rf* = 0.38 (hexane/AcOEt = 9:1); 1H NMR (400 MHz, CDCl3)  0.95 (t, *J* = 7.4 Hz, 3 H), 1.00 (t, *J* = 7.5 Hz, 3 H), 1.02 (t, *J* = 7.5 Hz, 3 H),1.08 (t, *J* = 7.5 Hz, 3 H),1.55-1.69 (m, 2 H), 1.83 (d, *J* = 3.9 Hz, 1 H), 1.94-2.38 (m, 10 H), 2.55 (dd, *J* = 12.2, 5.1 Hz, 1 H), 2.86-2.94 (m, 1 H), 4.17-4.22 (m, 1 H); 13C NMR (100 MHz, CDCl3)  12.89, 13.66, 15.45, 15.69, 20.99, 21.29, 22.92, 25.55, 31.34, 32.80, 38.23, 47.68, 75.79, 129.64, 129.97, 135.82, 136.08; IR (neat) 3551, 2967, 2872, 1454, 1375, 1047 cm-1; GCMS (EI, 70 eV) *m/z* (rel int, %) 248 (M+, 100); HRMS for C17H28O (M+): Calcd, 248.2140. Found, 248.2115.

**3,5-Dinitrobenzeoic acid 4,5,6,7-tetraethyl-2,3,3a,7a-tetrahydro-1*H*inden-1-yl ester:** To a solution of racemic **11** (400 mg, 1.61 mmol) in pyridine (5 mL) was added 3,5-dinitrobenzoyl chloride (740 mg, 3.20 mmol). The mixture was stirred at 80 °C for 1 h. After cooling, water (15 mL) was added, and the mixture was cooled in a ice bath for 2 h. The mixture was filtrated, and washed 5 % Na2CO3 (20 mL) and then water. The residue was recrystallized in Et2O/EtOH to give the titled compound (498 mg, 70%) as yellow crystals; mp 104-105 °C; *Rf* = 0.41 (hexane/AcOEt = 9:1); 1H NMR (500 MHz, CDCl3)  0.94-1.10 (m, 12 H), 1.75-1.78 (m, 2 H), 2.03-2.43 (m, 10 H), 2.75 (dd, *J* = 8.3, 7.9 Hz, 1 H), 2.86 (dd, *J* = 8.3, 3.4 Hz, 1 H), 5.56 (dd, *J* = 7.2, 3.4 Hz, 1 H), 9.14 (d, *J* = 2.1 Hz, 2 H), 9.23 (t, *J* = 2.1 Hz, 1 H); 13C NMR (125 MHz, CDCl3)  13.73, 13.74, 15.28, 15.45, 21.03, 21.10, 23.93, 24.60, 30.11, 31.10, 40.42, 48.09, 86.06, 122.20, 129.33, 129.40, 131.71, 133.46, 134.19, 134.54, 148.67, 162.20; IR (disk) 2965, 2872, 1719, 1631, 1541, 1460, 1346, 1302 cm-1; DIMS (EI, 70 eV) *m/z* (rel int, %) 442 (M+, 10), 201 (100). Anal. Calcd for C24H30O6N2: C, 65.14; H, 6.83; N, 6.33. Found: C, 65.01; H, 6.84; N, 6.40.

**(*S*)-Methylmandelic acid 4,5,6,7-tetraethyl-2,3,3a,7a-tetrahydro-1*H*inden-1-yl ester (13) and its diastereomer (14):** (*S*)-*O*-Methylmandelic acid (332 mg, 2.0 mmol) was added to a white suspension prepared by the slow addition of 280 mg (2.2 mmol) of oxalyl chloride to 220 mg (3.0 mmol) of DMF in 10 mL of acetonitrile at 0 °C. After 5 min, a solution of 546 mg (2.2 mmol) of **11** in 368 mg (4.4 mmol) of pyridine was added over 5-min period and the resultant mixture stirred at 0 °C for 1 h. The pale yellow reaction mixture was diluted with 20 mL of ether, the organic phase washed twice with brine and dried over MgSO4, and the solvent removed in vacuo to give a yellow oil. Purification by column chromatography on silica gel to yield **13** and **14** (738 mg, 93 %) as a colorless oil; bp 105 °C (2 mmHg) *Rf* = 0.33 (hexane/AcOEt = 19:1); 1H NMR (400 MHz, CDCl3) **13**:  0.83-1.01 (m, 12 H), 1.52-2.30 (m, 12 H), 2.51-2.57 (m, 1 H), 2.63 (dd, *J* = 2.5, 9.1 Hz, 1 H), 3.42 (s, 3 H), 4.74 (s, 1 H), 5.26-5.29 (m, 1 H), 7.30-7.46 (m, 5 H); **14**:  0.83-1.01 (m, 12 H), 1.52-2.30 (m, 12 H), 2.39-2.47 (m, 2 H), 3.42 (s, 3 H), 4.73 (s, 1 H), 5.21-5.25 (m, 1 H), 7.30-7.46 (m, 5 H); 13C NMR (100 MHz, CDCl3)  13.40, 13.57, 13.64, 15.25, 15.41, 20.92, 20.95, 20.98, 23.93, 23.49, 24.46, 24.63, 30.06, 30.20, 30.69, 30.92, 39.77, 39.95, 47.47, 47.64, 57.30, 82.64, 82.83, 83.71, 83.80, 127.02, 127.14, 128.49, 128.52, 128.54, 128.57, 129.81, 130.02, 131.21, 132.60, 132.85, 134.15, 134.34, 136.42, 170.25, 170.30; IR (neat) 2965, 2872, 1748, 1454, 1177, 1115 cm-1; DIMS (EI, 70 eV) *m/z* (rel int, %) 396 (M+, 4), 201 (100). Anal. Calcd for C26H36O3: C, 78.75; H, 9.15. Found: C, 78.59; H, 9.23.

**Reference**

Trost, B. M.; Belletire, J. L.; Godleski, S.; McDougal, P. G.; Balkovec, J. M. *J. Org. Chem.* **1986**, *51*, 2370.
